# Supplementary material for: Highly Selective CO2 Hydrogenation to Methanol over Complex In/Co Catalysts: Effect of Polymer Frame
Source: MDPI journal article supplement (doi:10.3390/nano13232996), 2023-11-22
Supplement: s1 [file s1]

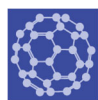

# Highly Selective CO<sub>2</sub> Hydrogenation to Methanol over Complex In/Co Catalysts: Effect of Polymer Frame

Svetlana A. Sorokina <sup>1</sup>, Nina V. Kuchkina <sup>1</sup>, Stepan P. Mikhailov <sup>2</sup>, Alexander V. Mikhilchenko <sup>1</sup>, Alexey V. Bykov <sup>2</sup>, Valentin Yu. Doluda <sup>2</sup>, Lyudmila M. Bronstein <sup>3,\*</sup> and Zinaida B. Shifrina <sup>1,\*</sup>

<sup>1</sup> A.N. Nesmeyanov Institute of Organoelement Compounds, Russian Academy of Sciences, 28 Vavilov St., 119991 Moscow, Russia; sorokinas@ineos.ac.ru (S.A.S.); kuchkina@ineos.ac.ru (N.V.K.); koal2702@yandex.ru (A.V.M.)

<sup>2</sup> Department of Biotechnology and Chemistry, Tver State Technical University, 22 A. Nikitina St., 170026 Tver, Russia; stefan.oblivion@mail.ru (S.P.M.); bykovav@yandex.ru (A.V.B.); doludav@yandex.ru (V.Y.D.)

<sup>3</sup> Department of Chemistry, Indiana University, 800 E. Kirkwood Av., Bloomington, IN 47405, USA

\* Correspondence: lybronst@indiana.edu (L.M.B.); shifrina@ineos.ac.ru (Z.B.S.)

**Table S1.** Summary of the catalysts synthesized. All catalysts contain SiO<sub>2</sub>-Fe<sub>3</sub>O<sub>4</sub>-PPP as a support, unless otherwise is stated.

| Sample notation                                    | Metal content, wt% |     |                       |     |
|----------------------------------------------------|--------------------|-----|-----------------------|-----|
|                                                    | by loading         |     | by elemental analysis |     |
|                                                    | In                 | Co  | In                    | Co  |
| 3In                                                | 3                  | 0   | 3.2                   | 0   |
| 1.5In                                              | 1.5                | 0   | 1.8                   | 0   |
| 3In/3Co                                            | 3                  | 3   | 3.1                   | 3.0 |
| 3In/1.5Co                                          | 3                  | 1.5 | 3.3                   | 1.6 |
| 3In/0.3Co                                          | 3                  | 0.3 | 3.2                   | 0.3 |
| 1.5In/1.5Co                                        | 1.5                | 1.5 | 1.6                   | 1.7 |
| 1.5In/0.9Co                                        | 1.5                | 0.9 | 1.7                   | 1.0 |
| 1.5In/0.6Co                                        | 1.5                | 0.6 | 1.6                   | 0.6 |
| 1.5In/0.3Co                                        | 1.5                | 0.3 | 1.6                   | 0.4 |
| 1.5In/0.1Co                                        | 1.5                | 0.1 | 1.7                   | 0.2 |
| 1.0In/0.5Co                                        | 1.0                | 0.5 | 1.2                   | 0.5 |
| 0.7In/0.7Co                                        | 0.7                | 0.7 | 0.8                   | 0.8 |
| 1.5In/0.3Co without Fe <sub>3</sub> O <sub>4</sub> | 1.5                | 0.3 | 1.7                   | 0.4 |
| 1.5In/0.3Co without PPP                            | 1.5                | 0.3 | 1.6                   | 0.4 |
| 3In/3Co without PPP                                | 3                  | 3   | 3.3                   | 3.2 |

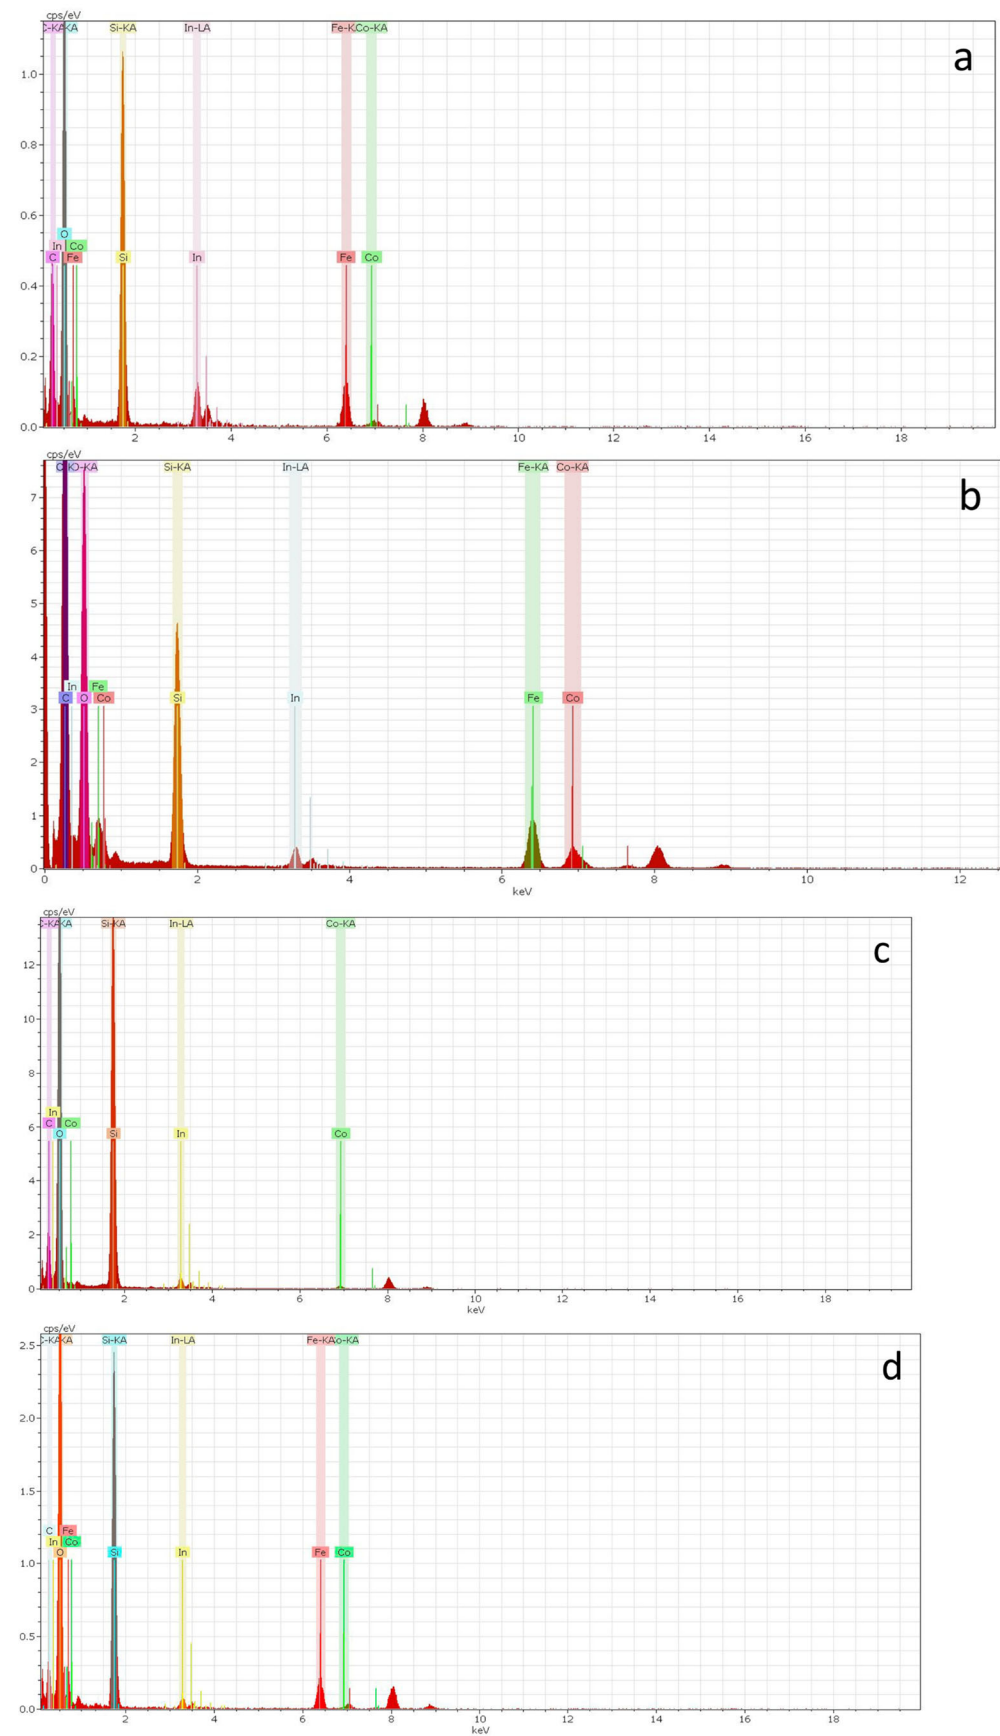

**Figure S1.** EDX spectra of 1.5In/0.3Co (a), 3In/3Co (b), 1.5In/0.3Co without Fe<sub>3</sub>O<sub>4</sub> (c) and 1.5In/0.3Co without PPP (d).

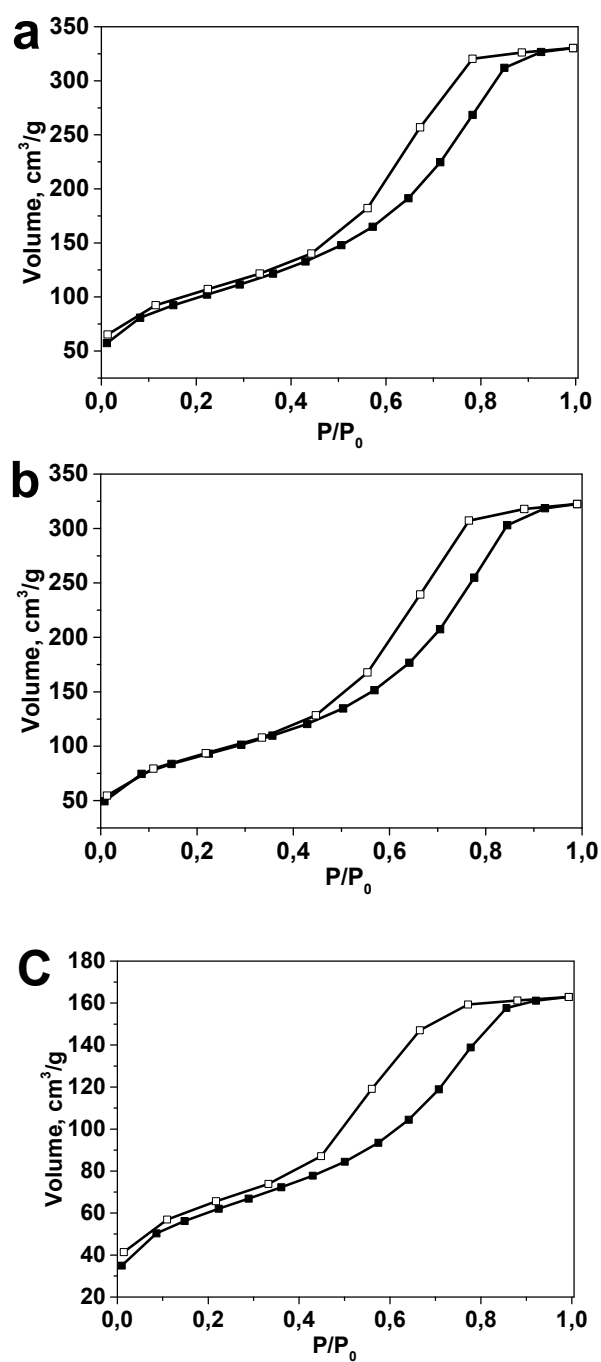

Figure S2.  $N_2$  adsorption-desorption isotherms of 1.5In (a), 1.5In/0.3Co (b) and 3In/3Co (c) catalysts.

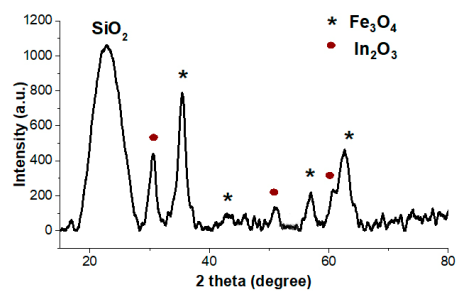

Figure S3. XRD pattern of 1.5In/0.3 Co without PPP.

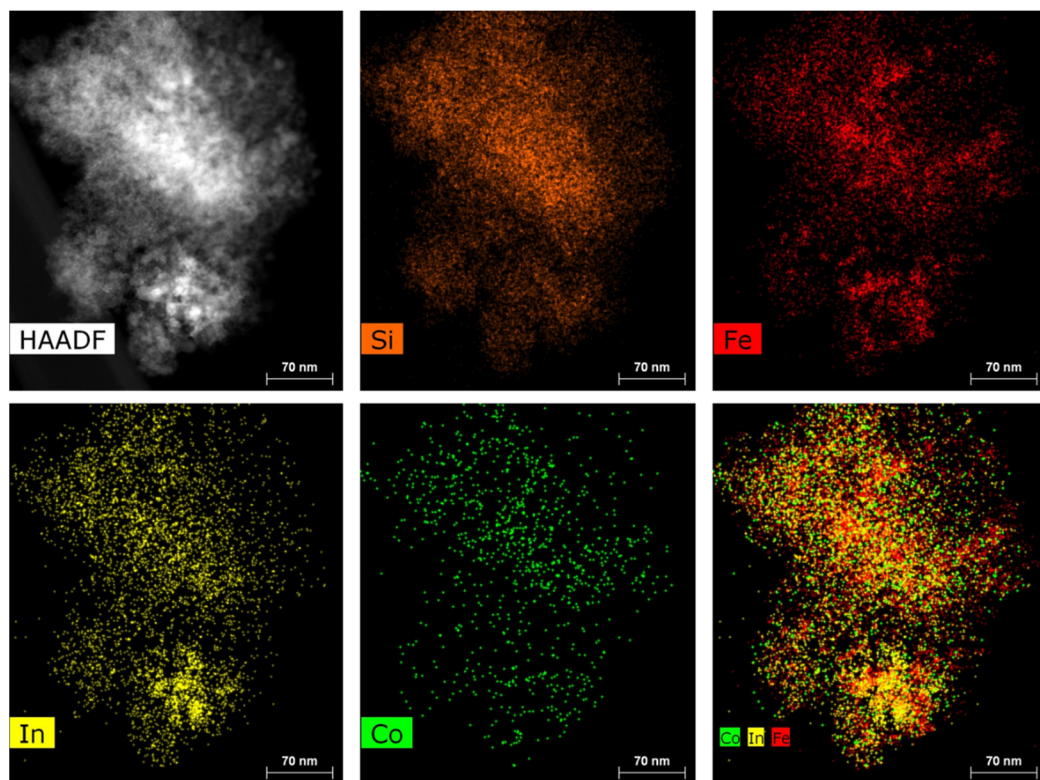

**Figure S4.** STEM dark field image and EDS maps of Si, Fe, In, Co and their superpositions of the 1.5In/0.3Co catalyst without the polymer layer.

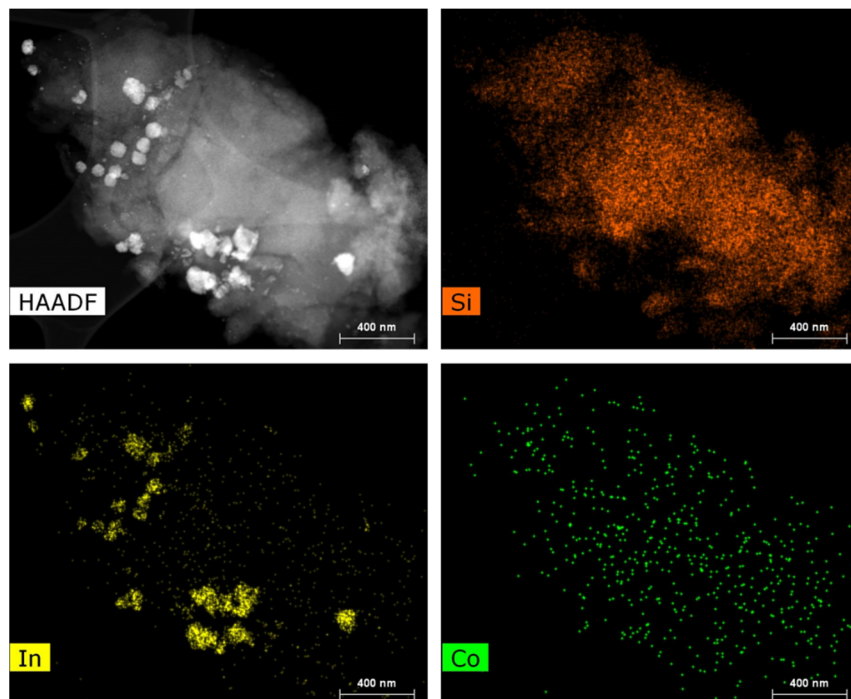

**Figure S5.** STEM dark field image and EDS maps of Si, In, Co and their superpositions of the 1.5In/0.3Co without magnetic NPs.

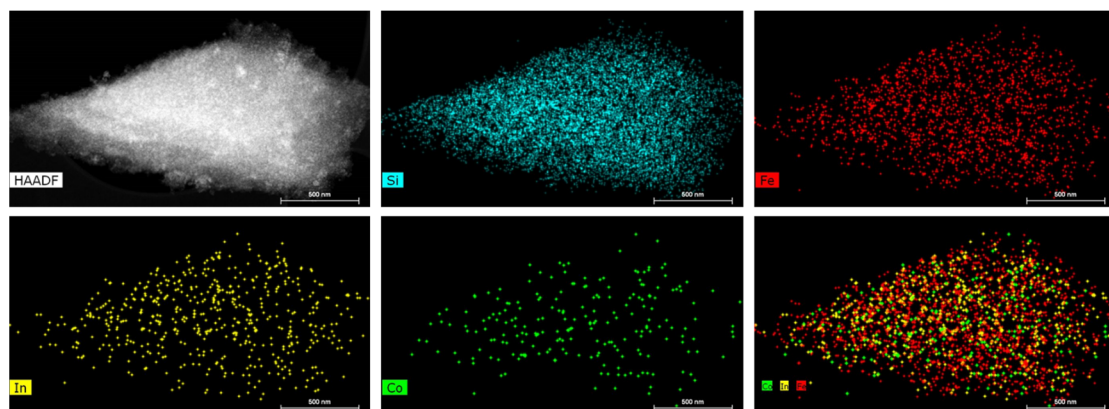

**Figure S6.** STEM dark field image and EDS maps of Si, Fe, In, Co and their superpositions of the 1.5In/0.3Co catalyst after the catalytic experiments.

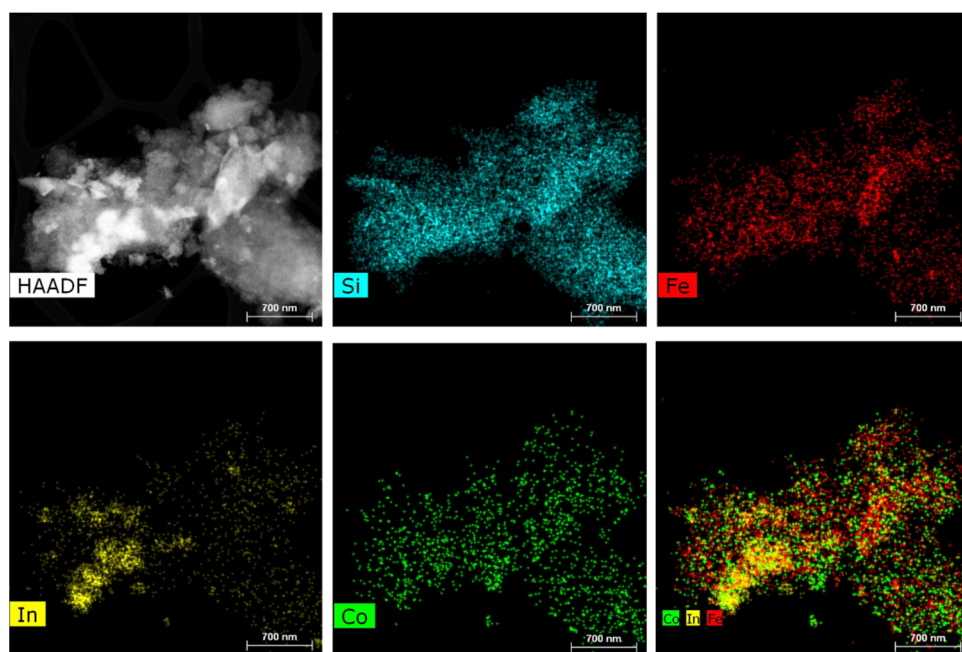

**Figure S7.** STEM dark field image and EDS maps of Si, Fe, In, Co and their superpositions of the 3In/3Co catalyst after the catalytic experiments.

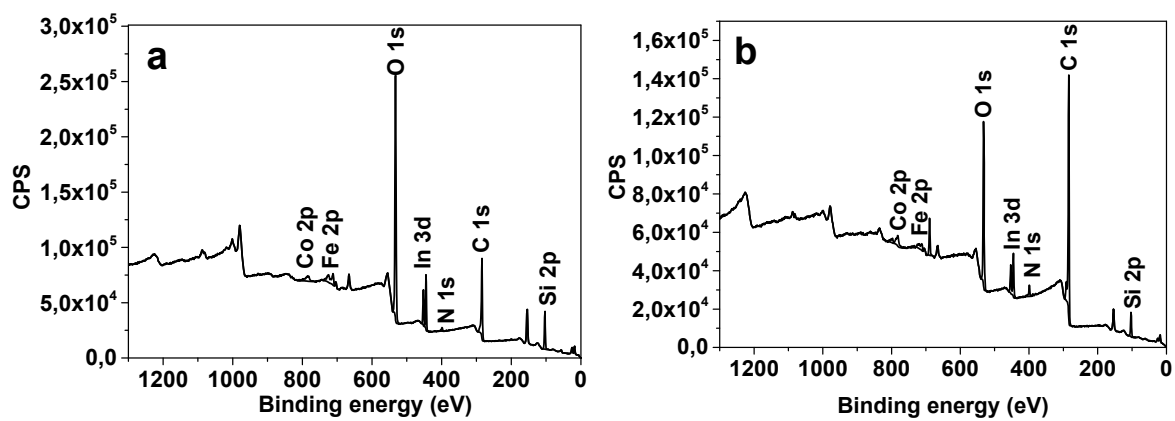

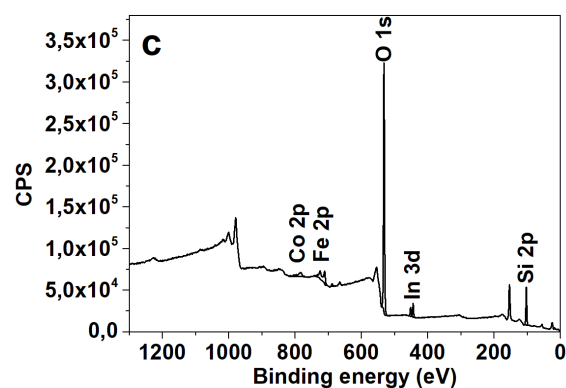

Figure S8. XPS survey spectra of 1.5In/0.3Co (a), 3In/3Co (b) and 1.5In/0.3Co without PPP (c).

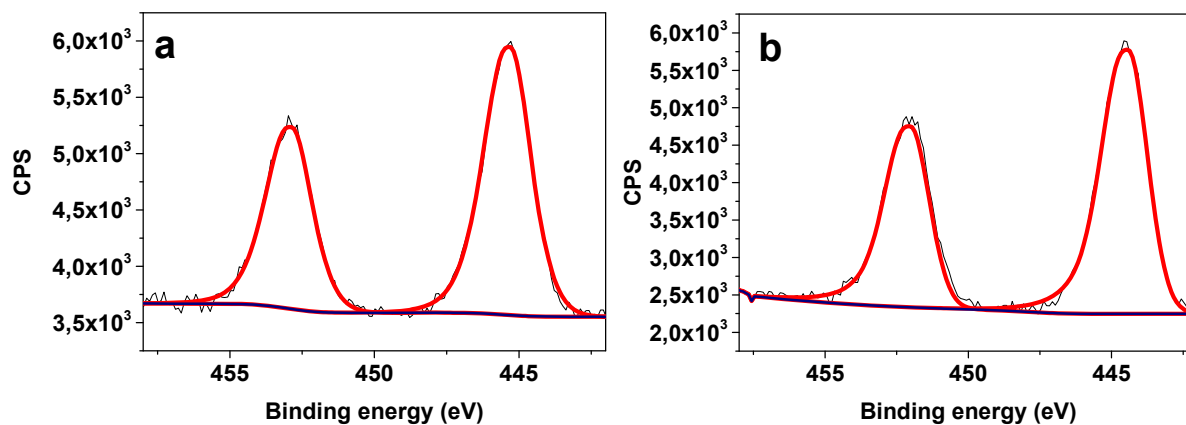

Figure S9. HR XPS spectra of In 3d of 3In/3Co catalyst (a) and 1.5In/0.3Co without PPP (b).

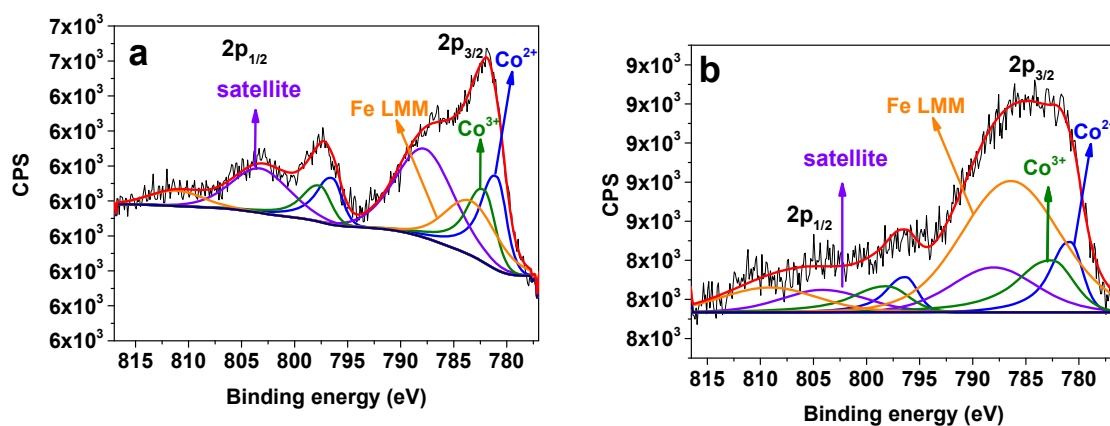

Figure S10. HR XPS spectra of Co 2p of 3In/3Co catalyst (a) and 1.5In/0.3Co without PPP (b).



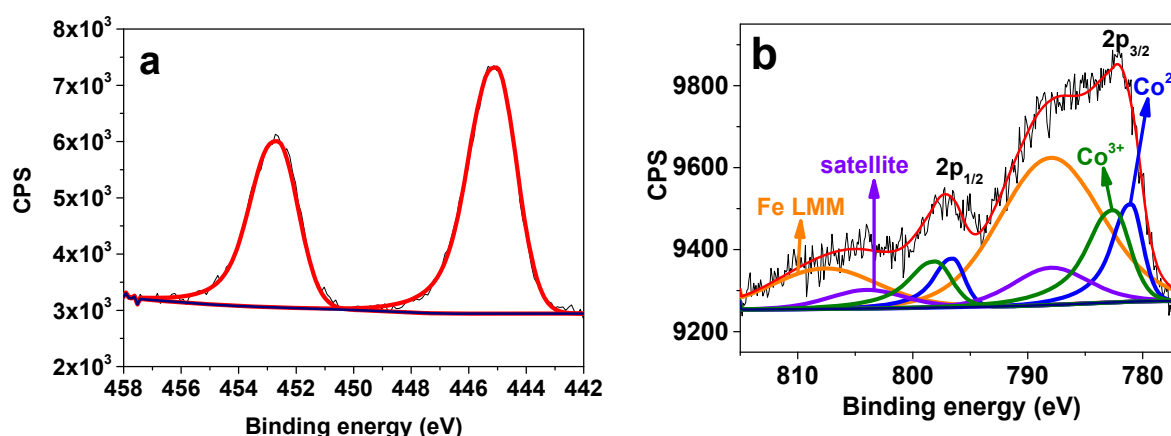

Figure S11. HR XPS spectra of In 3d (a) and Co 2p (b) of 1.5In/0.3Co after catalysis.

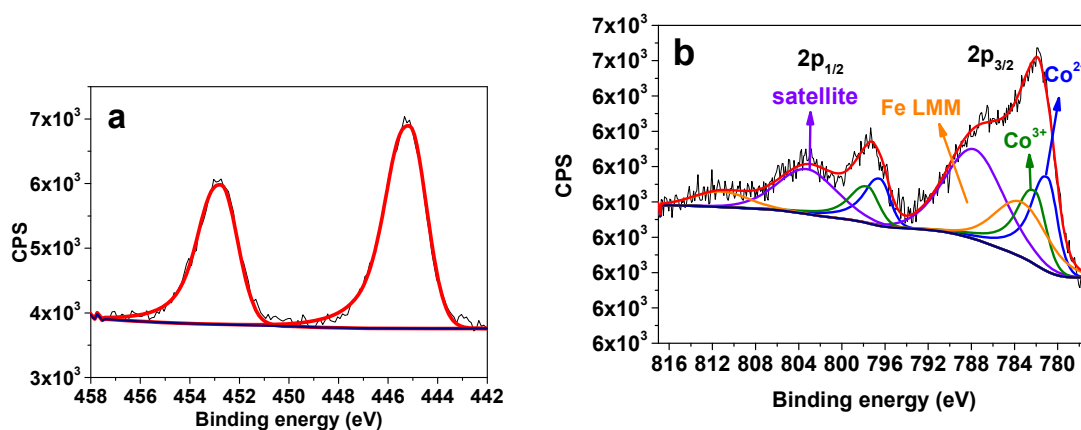

Figure S12. HR XPS spectra of In 3d (a) and Co 2p (b) of 3In/3Co after catalysis.

Table S2. Fitting parameters for HR XPS of Fe 2p of 1.5In/0.3Co before catalytic experiments.

|                                                    | Pos.   | FWHM  | %Area |
|----------------------------------------------------|--------|-------|-------|
| In 3p <sub>1/2</sub>                               | 704.52 | 3.11  | 13.53 |
| Fe 2p <sub>3/2</sub> (Fe <sup>2+</sup> )           | 711.20 | 2.33  | 13.12 |
| Fe 2p <sub>1/2</sub> (Fe <sup>2+</sup> )           | 724.80 | 2.56  | 6.56  |
| Fe 2p <sub>3/2</sub> (Fe <sup>2+</sup> ) Satellite | 720.83 | 8.00  | 14.99 |
| Fe 2p <sub>1/2</sub> (Fe <sup>2+</sup> ) Satellite | 734.43 | 8.00  | 7.50  |
| Fe 2p <sub>3/2</sub> (Fe <sup>3+</sup> )           | 712.80 | 2.87  | 14.85 |
| Fe 2p <sub>1/2</sub> (Fe <sup>3+</sup> )           | 726.40 | 2.87  | 7.43  |
| Co LMM                                             | 717.00 | 12.00 | 8.78  |
| Fe 2p <sub>3/2</sub> (Fe <sup>3+</sup> ) Satellite | 715.32 | 3.93  | 8.83  |
| Fe 2p <sub>1/2</sub> (Fe <sup>3+</sup> ) Satellite | 728.92 | 3.93  | 4.42  |

Table S3. Fitting parameters for HR XPS of Fe 2p of 1.5In/0.3Co after catalytic experiments.

|                                                    | Pos.   | FWHM | %Area |
|----------------------------------------------------|--------|------|-------|
| In 3p <sub>1/2</sub>                               | 704.26 | 2.69 | 6.18  |
| Fe 2p <sub>3/2</sub> (Fe <sup>2+</sup> )           | 711.17 | 2.92 | 25.90 |
| Fe 2p <sub>1/2</sub> (Fe <sup>2+</sup> )           | 724.77 | 3.21 | 12.95 |
| Fe 2p <sub>3/2</sub> (Fe <sup>2+</sup> ) Satellite | 717.96 | 8.06 | 14.42 |
| Fe 2p <sub>1/2</sub> (Fe <sup>2+</sup> ) Satellite | 731.56 | 8.06 | 7.21  |
| Fe 2p <sub>3/2</sub> (Fe <sup>3+</sup> )           | 713.50 | 4.12 | 15.94 |
| Fe 2p <sub>1/2</sub> (Fe <sup>3+</sup> )           | 727.10 | 4.12 | 7.97  |

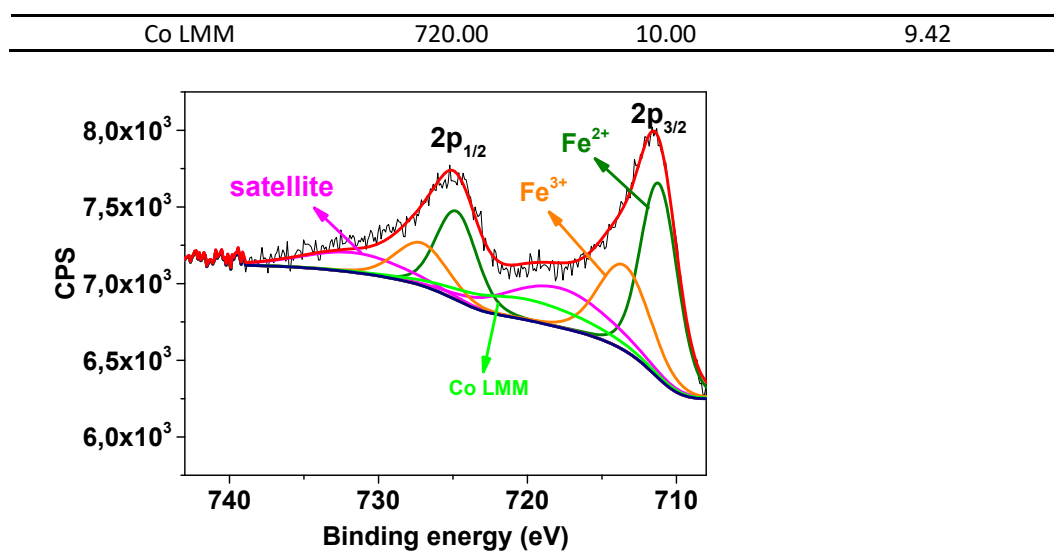

Figure S13. HR XPS spectra of Fe 2p of 1.5In/0.3Co after catalysis.

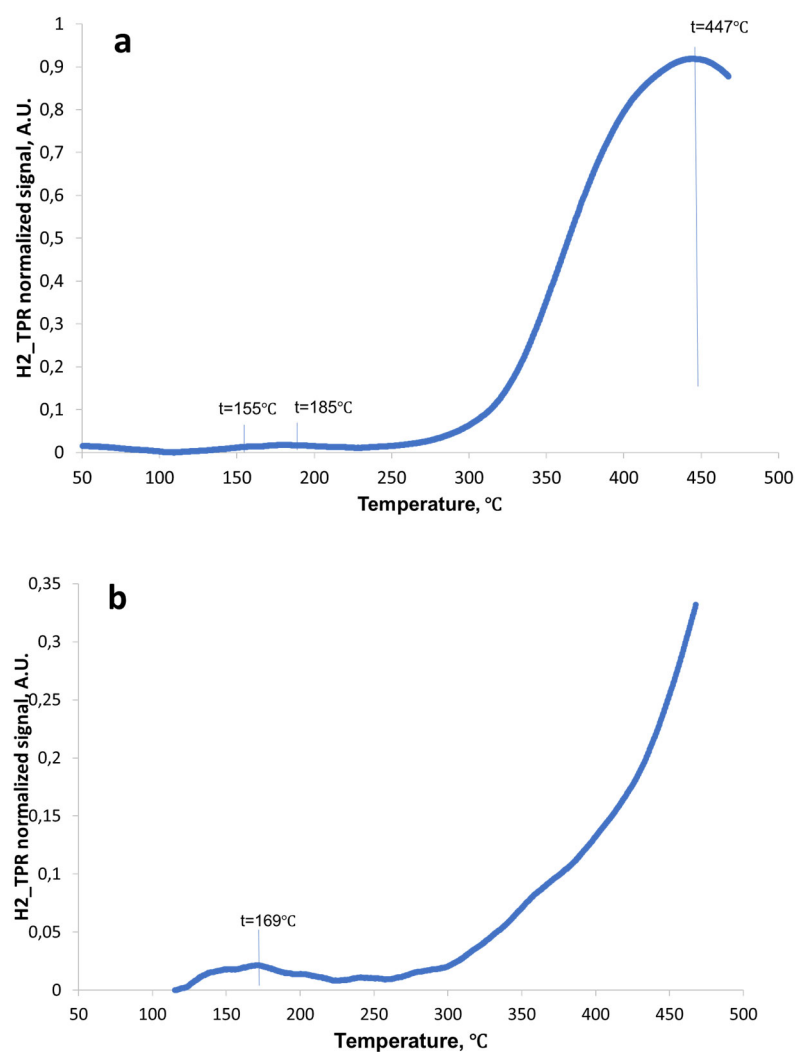

Figure S14. H<sub>2</sub> TPR profiles of 1.5In/0.3Co without PPP (a) and without Fe<sub>3</sub>O<sub>4</sub> (b).



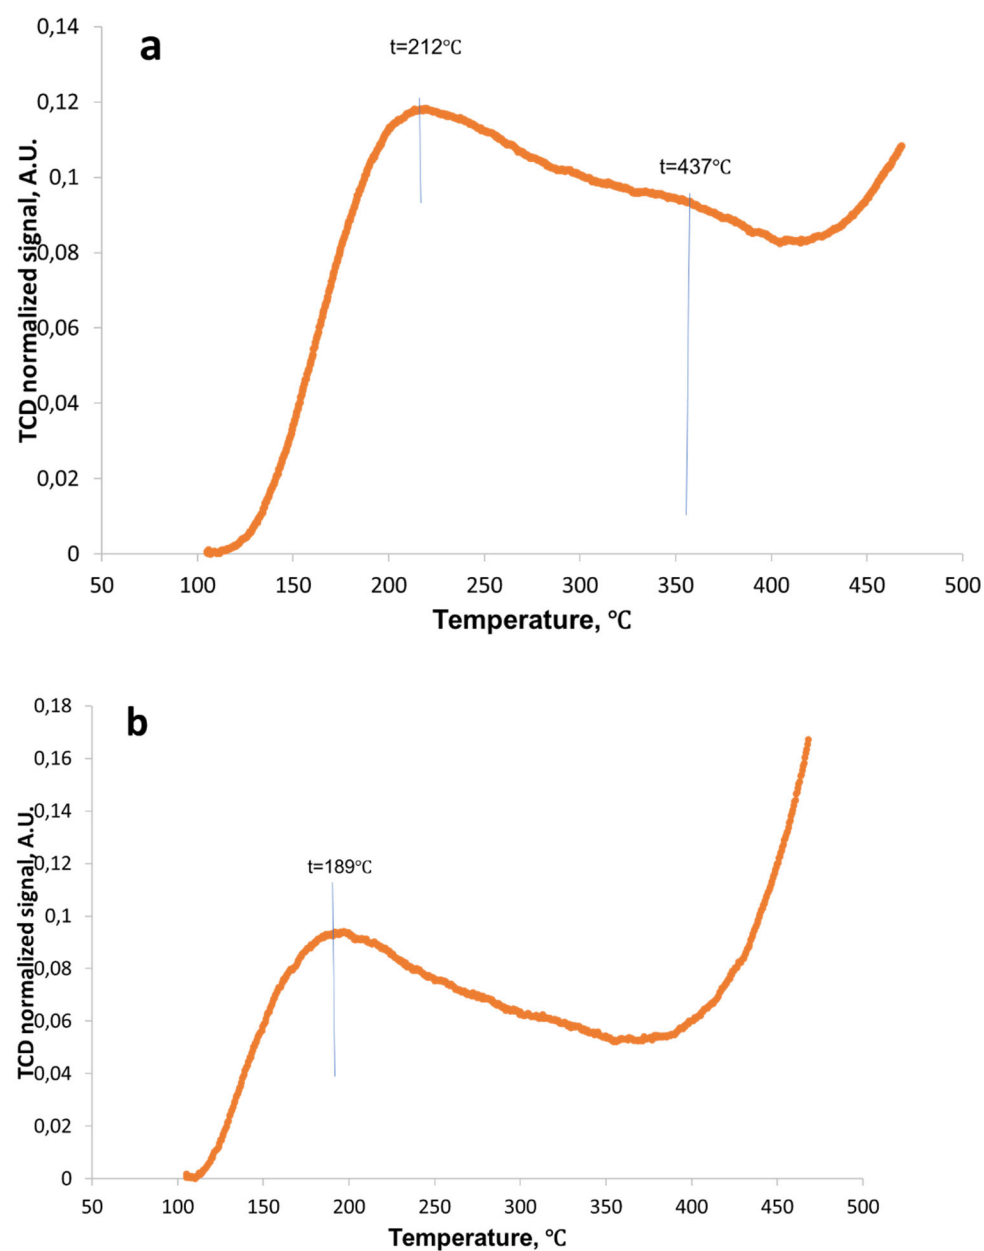

**Figure S15.** CO<sub>2</sub> TPD profiles of 1.5In/0.3Co without PPP **(a)** and without Fe<sub>3</sub>O<sub>4</sub> **(b)**.
